# Supplementary material for: Outcome Measures for Central Nervous System Evaluation in Myotonic Dystrophy Type 1 May Be Confounded by Deficits in Motor Function or Insight
Source: Front Neurol. 2018 Oct 2;9:780. doi: 10.3389/fneur.2018.00780 (PMC6176265; doi:10.3389/fneur.2018.00780)
Supplement: Supplementary File S2 — Linear regression analyses and Benjamini-Hochberg correction. [file Table_2.XLSX]

## Sheet: All linear regressions
Label	P-value	Adjusted R squared
BDI ~ informant-DEX	0.6331
BDI ~ self-DEX	8.011e-08	0.4802
BDI ~ FDSS	2.338e-06	0.3942
BDI ~ McGill pain	0.000243	0.2545
BDI ~ SF36 pain	0.0008566	0.2121
BDI ~ DM1-ActivC	0.02047	0.09821
BDI ~ MHDI short form	3.005e-05	0.3206
BDI ~ MDHI2 Mobility subscore	0.008534	0.1304
BDI ~ MDHI3 Upper limb subscore	0.000289	0.2488
BDI ~ MDHI4 Ability activities subscore	0.000727	0.2178
BDI ~ MDHI5 Communication subscore	0.000493	0.231
BDI ~ MDHI6 Social satisfaction subscore	1.776e-06	0.4107
BDI ~ MDHI7 social performance subscore	4.032e-07	0.4406
BDI ~ MDHI8 fatigue subscore	7.185e-05	0.2937
BDI ~ MDHI9 pain subscore	0.000345	0.2429
BDI ~ MDHI10 myotonia subscore	0.01734	0.1043
BDI ~ MDHI11 gastro subscore	8.9e-05	0.2869
BDI ~ MDHI12 swallow subscore	0.006335	0.1413
BDI ~ MDHI13 vision subscore	3.67e-05	0.3145
BDI ~ MDHI 14 emotional subscore	1.411e-10	0.611
BDI ~ MDHI15 sleep subscore	8.047e-06	0.3596
BDI ~ MDHI16 cognitive impairment subscore	5.95e-11	0.6261
BDI ~ MDHI17 hearing subscore	0.0008542	0.2122
BDI ~ MDHI18 breathing subscore	0.003224	0.1657
BDI ~ MDHI total	8.389e-07	0.4217
BDI ~ Stroop word	0.6005
BDI ~ Stroop colour	0.1497
BDI ~ Stroop colour-word	0.528
BDI ~ Stroop interference	0.5395
BDI ~ D-KEFS Trail 1	0.9551
BDI ~ D-KEFS Trail2	0.4011
BDI ~ D-KEFS Trail 3	0.7645
BDI ~ D-KEFS Trail 4	0.3837
BDI ~ D-KEFS Trail 5	0.2486
BDI ~ D-KEFS Trails motor contrast	0.04459	0.06939
BDI ~ FAS word association	0.8283
BDI ~ Block design standard score	0.5859
BDI ~ Block design non-adjusted score	0.6203
BDI ~ ECAS language	0.5097
BDI ~ ECAS verbal fluency	0.3141
BDI ~ ECAS executive	0.679
BDI ~ ECAS memory	0.7038
BDI ~ ECAS visuospatial	0.6016
BDI ~ ECAS total	0.4148
DM1ActivC ~ MDHI2 Mobility subscore	1.36e-14	0.7459
DM1ActivC ~ MDHI3 Upper limb subscore	8.473e-09	0.5308
DM1ActivC ~ MDHI4 Ability to do activities subscore	1.587e-12	0.6836
FDSScentile score ~ MDHI8 fatigue subscore	2.859e-08	0.504
SF36 pain items ~ MDHI9 pain subscore	1.169e-08	0.5238
McGill pain scale ~ MDHI9 pain subscore	6.63e-10	0.5824
Self-DEX ~ Stroop word	0.3957
Self-DEX ~ Stroop colour	0.7181
Self-DEX ~ Stroop colour-word	0.8043
Self-DEX ~ Stroop interference	0.9889
Self-DEX ~ D-KEFS Trail 1	0.4457
Self-DEX ~ D-KEFS Trail2	0.5499
Self-DEX ~ D-KEFS Trail 3	0.9542
Self-DEX ~ D-KEFS Trail 4	0.5029
Self-DEX ~ D-KEFS Trail 5	0.3267
Self-DEX ~ D-KEFS Trails motor contrast	0.1018
Self-DEX ~ FAS word association	0.278
Self-DEX ~ Block design standard score	0.8326
Self-DEX ~ Block design non-adjusted score	0.8006
Self-DEX ~ ECAS language	0.5606
Self-DEX ~ ECAS verbal fluency	0.4448
Self-DEX ~ ECAS executive	0.9357
Self-DEX ~ ECAS memory	0.131
Self-DEX ~ ECAS visuospatial	0.3808
Self-DEX ~ ECAS total	0.8385
FDSS centile score ~ Stroop word	0.6639
FDSS centile score ~ Stroop colour	0.9355
FDSS centile score ~ Stroop colour-word	0.4347
FDSS centile score ~ Stroop interference	0.07243
FDSS centile score ~ D-KEFS Trail 1	0.3872
FDSS centile score ~ D-KEFS Trail2	0.8034
FDSS centile score ~ D-KEFS Trail 3	0.4787
FDSS centile score ~ D-KEFS Trail 4	0.6864
FDSS centile score ~ D-KEFS Trail 5	0.1604
FDSS centile score ~ D-KEFS Trails motor contrast	0.1173
FDSS centile score ~ FAS word association	0.8371
FDSS centile score ~ Block design standard score	0.06532
FDSS centile score ~ Block design non-adjusted score	0.1368
FDSS centile score ~ ECAS language	0.858
FDSS centile score ~ ECAS verbal fluency	0.2993
FDSS centile score ~ ECAS executive	0.3892
FDSS centile score ~ ECAS memory	0.4912
FDSS centile score ~ ECAS visuospatial	0.4617
FDSS centile score ~ ECAS total	0.6846
McGill pain scale ~ Stroop word	0.2662
McGill pain scale ~ Stroop colour	0.3704
McGill pain scale ~ Stroop colour-word	0.1431
McGill pain scale ~ Stroop interference	0.1656
McGill pain scale ~ D-KEFS Trail 1	0.5947
McGill pain scale ~ D-KEFS Trail2	0.6624
McGill pain scale ~ D-KEFS Trail 3	0.8168
McGill pain scale ~ D-KEFS Trail 4	0.5618
McGill pain scale ~ D-KEFS Trail 5	0.2744
McGill pain scale ~ D-KEFS Trails motor contrast	0.1126
McGill pain scale ~ FAS word association	0.5057
McGill pain scale ~ Block design standard score	0.3683
McGill pain scale ~ Block design non-adjusted score	0.7077
McGill pain scale ~ ECAS language	0.9138
McGill pain scale ~ ECAS verbal fluency	0.7602
McGill pain scale ~ ECAS executive	0.7976
McGill pain scale ~ ECAS memory	0.9862
McGill pain scale ~ ECAS visuospatial	0.5545
McGill pain scale ~ ECAS total	0.7528
DM1ActivC ~ Stroop word	0.041	0.076
DM1ActivC ~ Stroop colour	0.027	0.116
DM1ActivC ~ Stroop colour-word	0.186
DM1ActivC ~ Stroop interference	0.283
DM1ActivC ~ D-KEFS Trail 1	0.00128	0.1983
DM1ActivC ~ D-KEFS Trail2	0.01414	0.1119
DM1ActivC ~ D-KEFS Trail 3	0.02612
DM1ActivC ~ D-KEFS Trail 4	0.09848
DM1ActivC ~ D-KEFS Trail 5	4.96e-05	0.3052
DM1ActivC ~ D-KEFS Trails motor contrast	0.1856
DM1ActivC ~ FAS word association	0.8121
DM1ActivC ~ Block design standard score	0.0005198	0.2292
DM1ActivC ~ Block design non-adjusted score	0.0009108	0.21
DM1ActivC ~ ECAS language	0.5372
DM1ActivC ~ ECAS verbal fluency	0.3701
DM1ActivC ~ ECAS executive	0.336
DM1ActivC ~ ECAS memory	0.2524
DM1ActivC ~ ECAS visuospatial	0.2886
DM1ActivC ~ ECAS total	0.4142
Informant-DEX ~ Stroop word	0.003248	0.181
Informant-DEX ~ Stroop colour	0.0629
Informant-DEX ~ Stroop colour-word	0.1381
Informant-DEX ~ Stroop interference	0.6105
Informant-DEX ~ D-KEFS Trail 1	0.03601
Informant-DEX ~ D-KEFS Trail2	0.6185
Informant-DEX ~ D-KEFS Trail 3	0.599
Informant-DEX ~ D-KEFS Trail 4	0.5169
Informant-DEX ~ D-KEFS Trail 5	0.5825
Informant-DEX ~ D-KEFS Trails motor contrast	0.8025
Informant-DEX ~ FAS word association	0.06559
Informant-DEX ~ Block design standard score	0.1769
Informant-DEX ~ Block design non-adjusted score	0.4055
Informant-DEX ~ ECAS language	0.2189
Informant-DEX ~ ECAS verbal fluency	0.4174
Informant-DEX ~ ECAS executive	0.2864
Informant-DEX ~ ECAS memory	0.7948
Informant-DEX ~ ECAS visuospatial	0.9806
Informant-DEX ~ ECAS total	0.2782
LogPAL ~ informant-DEX	0.6193
LogPAL ~ self-DEX	0.2191
LogPAL ~ FDSS	0.241
LogPAL ~ McGill pain	0.7687
LogPAL ~ SF36 pain	0.704
LogPAL ~ BDI	0.9883
LogPAL ~ DM1-ActivC	0.2253
LogPAL ~ MHDI short form	0.148
LogPAL ~ MDHI2 Mobility subscore	0.07789
LogPAL ~ MDHI3 Upper limb subscore	0.1208
LogPAL ~ MDHI4 Ability activities subscore	0.2819
LogPAL ~ MDHI5 Communication subscore	0.3624
LogPAL ~ MDHI6 Social satisfaction subscore	0.2621
LogPAL ~ MDHI7 social performance subscore	0.1867
LogPAL ~ MDHI8 fatigue subscore	0.1622
LogPAL ~ MDHI9 pain subscore	0.2831
LogPAL ~ MDHI10 myotonia subscore	0.3562
LogPAL ~ MDHI11 gastro subscore	0.05998
LogPAL ~ MDHI12 swallow subscore	0.3497
LogPAL ~ MDHI13 vision subscore	0.1203
LogPAL ~ MDHI 14 emotional subscore	0.4555
LogPAL ~ MDHI15 sleep subscore	0.8738
LogPAL ~ MDHI16 cognitive impairment subscore	0.7547
LogPAL ~ MDHI17 hearing subscore	0.6523
LogPAL ~ MDHI18 breathing subscore	0.2599
LogPAL ~ MDHI total	0.2271
LogPAL ~ Stroop word	0.7969
LogPAL ~ Stroop colour	0.5407
LogPAL ~ Stroop colour-word	0.3251
LogPAL ~ Stroop interference	0.3755
LogPAL ~ D-KEFS Trail 1	0.1445
LogPAL ~ D-KEFS Trail2	0.1568
LogPAL ~ D-KEFS Trail 3	0.1142
LogPAL ~ D-KEFS Trail 4	0.3172
LogPAL ~ D-KEFS Trail 5	0.1268
LogPAL ~ D-KEFS Trails motor contrast	0.8131
LogPAL ~ FAS word association	0.2851
LogPAL ~ Block design standard score	0.0547
LogPAL ~ Block design non-adjusted score	0.2919
LogPAL ~ ECAS language	0.7964
LogPAL ~ ECAS verbal fluency	0.8421
LogPAL ~ ECAS executive	0.5504
LogPAL ~ ECAS memory	0.3652
LogPAL ~ ECAS visuospatial	0.216
LogPAL ~ ECAS total	0.6476
Age + logPAL + (Age*logPAL) ~ informant-DEX	0.6082
Age + logPAL + (Age*logPAL) ~ self-DEX	0.2527
Age + logPAL + (Age*logPAL) ~ FDSS	0.3121
Age + logPAL + (Age*logPAL) ~ McGill pain	0.4305
Age + logPAL + (Age*logPAL) ~ SF36 pain	0.3645
Age + logPAL + (Age*logPAL) ~ BDI	0.9496
Age + logPAL + (Age*logPAL) ~ DM1-ActivC	0.03819	0.1238
Age + logPAL + (Age*logPAL) ~ MHDI short form	0.124
Age + logPAL + (Age*logPAL) ~ MDHI2 Mobility subscore	0.007895	0.1936
Age + logPAL + (Age*logPAL) ~ MDHI3 Upper limb subscore	0.1659
Age + logPAL + (Age*logPAL) ~ MDHI4 Ability activities subscore	0.1163
Age + logPAL + (Age*logPAL) ~ MDHI5 Communication subscore	0.6145
Age + logPAL + (Age*logPAL) ~ MDHI6 Social satisfaction subscore	0.4196
Age + logPAL + (Age*logPAL) ~ MDHI7 social performance subscore	0.3821
Age + logPAL + (Age*logPAL) ~ MDHI8 fatigue subscore	0.07954
Age + logPAL + (Age*logPAL) ~ MDHI9 pain subscore	0.3573
Age + logPAL + (Age*logPAL) ~ MDHI10 myotonia subscore	0.106
Age + logPAL + (Age*logPAL) ~ MDHI11 gastro subscore	0.3151
Age + logPAL + (Age*logPAL) ~ MDHI12 swallow subscore	0.585
Age + logPAL + (Age*logPAL) ~ MDHI13 vision subscore	0.1145
Age + logPAL + (Age*logPAL) ~ MDHI 14 emotional subscore	0.8986
Age + logPAL + (Age*logPAL) ~ MDHI15 sleep subscore	0.6315
Age + logPAL + (Age*logPAL) ~ MDHI16 cognitive impairment subscore	0.9649
Age + logPAL + (Age*logPAL) ~ MDHI17 hearing subscore	0.9348
Age + logPAL + (Age*logPAL) ~ MDHI18 breathing subscore	0.7389
Age + logPAL + (Age*logPAL) ~ MDHI total	0.2008
Age + logPAL + (Age*logPAL) ~ Stroop word	0.8
Age + logPAL + (Age*logPAL) ~ Stroop colour	0.1424
Age + logPAL + (Age*logPAL) ~ Stroop colour-word	0.4856
Age + logPAL + (Age*logPAL) ~ Stroop interference	0.2644
Age + logPAL + (Age*logPAL) ~ D-KEFS Trail 1	0.3502
Age + logPAL + (Age*logPAL) ~ D-KEFS Trail2	0.4274
Age + logPAL + (Age*logPAL) ~ D-KEFS Trail 3	0.1105
Age + logPAL + (Age*logPAL) ~ D-KEFS Trail 4	0.2096
Age + logPAL + (Age*logPAL) ~ D-KEFS Trail 5	0.2982
Age + logPAL + (Age*logPAL) ~ D-KEFS Trails motor contrast	0.6801
Age + logPAL + (Age*logPAL) ~ FAS word association	0.2852
Age + logPAL + (Age*logPAL) ~ Block design standard score	0.01734	0.1597
Age + logPAL + (Age*logPAL) ~ Block design non-adjusted score	0.005072	0.2119
Age + logPAL + (Age*logPAL) ~ ECAS language	0.4772
Age + logPAL + (Age*logPAL) ~ ECAS verbal fluency	0.04034	0.1213
Age + logPAL + (Age*logPAL) ~ ECAS executive	0.2693
Age + logPAL + (Age*logPAL) ~ ECAS memory	0.1737
Age + logPAL + (Age*logPAL) ~ ECAS visuospatial	0.1821
Age + logPAL + (Age*logPAL) ~ ECAS total	0.2624
MAL ~ informant-DEX	0.2808
MAL ~ self-DEX	0.5561
MAL ~ FDSS	0.09254
MAL ~ McGill pain	0.1854
MAL ~ SF36 pain	0.1285
MAL ~ BDI	0.8492
MAL ~ DM1-ActivC	0.006048	0.143
MAL ~ MHDI short form	0.02077	0.09768
MAL ~ MDHI2 Mobility subscore	0.0008874	0.2109
MAL ~ MDHI3 Upper limb subscore	0.01673	0.1057
MAL ~ MDHI4 Ability activities subscore	0.02649	0.08866
MAL ~ MDHI5 Communication subscore	0.3626
MAL ~ MDHI6 Social satisfaction subscore	0.08536
MAL ~ MDHI7 social performance subscore	0.0602	0.05833
MAL ~ MDHI8 fatigue subscore	0.01518	0.1093
MAL ~ MDHI9 pain subscore	0.04091	0.07257
MAL ~ MDHI10 myotonia subscore	0.06606	0.05492
MAL ~ MDHI11 gastro subscore	0.049	0.06591
MAL ~ MDHI12 swallow subscore	0.0886
MAL ~ MDHI13 vision subscore	0.2812
MAL ~ MDHI 14 emotional subscore	0.4564
MAL ~ MDHI15 sleep subscore	0.8708
MAL ~ MDHI16 cognitive impairment subscore	0.603
MAL ~ MDHI17 hearing subscore	0.5504
MAL ~ MDHI18 breathing subscore	0.04579	0.06841
MAL ~ MDHI total	0.032	0.08167
MAL ~ Stroop word	0.8393
MAL ~ Stroop colour	0.326
MAL ~ Stroop colour-word	0.3259
MAL ~ Stroop interference	0.1641
MAL ~ D-KEFS Trail 1	0.1719
MAL ~ D-KEFS Trail2	0.04153	0.07202
MAL ~ D-KEFS Trail 3	0.0598	0.05858
MAL ~ D-KEFS Trail 4	0.2706
MAL ~ D-KEFS Trail 5	0.04811	0.06658
MAL ~ D-KEFS Trails motor contrast	0.6224
MAL ~ FAS word association	0.9357
MAL ~ Block design standard score	0.00303	0.1679
MAL ~ Block design non-adjusted score	0.02735	0.08747
MAL ~ ECAS language	0.4119
MAL ~ ECAS verbal fluency	0.4736
MAL ~ ECAS executive	0.7518
MAL ~ ECAS memory	0.8505
MAL ~ ECAS visuospatial	0.2379
MAL ~ ECAS total	0.647
GMV ~ age	1.522e-09	0.6218
GMV ~ age + gender	1.058e-09	0.6652
GMV ~ age + gender + logPAL	1.043e-09	0.697
GMV ~ age + BMI	1.042e-08	0.6198
GMV ~ age + smoking status	4.27e-09	0.6382
GMV ~ Self-DEX	0.3894
GMV ~ informant-DEX	0.02881	0.1044
GMV ~ BDI	0.3528
GMV ~ MDHI16 Cognitive impairment subscore	0.8998
GMV ~ Stroop word	0.005677	0.1714
GMV ~ Stroop colour	0.0001743	0.3161
GMV ~ Stroop colour-word	0.03296	0.1012
GMV ~ Stroop interference	0.1513
GMV ~ D-KEFS Trail 1	0.06793
GMV ~ D-KEFS Trail2	0.3113
GMV ~ D-KEFS Trail 3	0.03605	0.089
GMV ~ D-KEFS Trail 4	0.05088
GMV ~ D-KEFS Trail 5	0.4565
GMV ~ D-KEFS Trails motor contrast	0.1121
GMV ~ FAS word association	0.7785
GMV ~ Block design standard score	0.1211
GMV ~ Block design non-adjusted score	0.02512	0.1048
GMV ~ ECAS language	0.9143
GMV ~ ECAS verbal fluency	0.7441
GMV ~ ECAS executive	0.01608	0.1237
GMV ~ ECAS memory	0.2407
GMV ~ ECAS visuospatial	0.1848
GMV ~ ECAS total	0.08639
Age ~ Stroop word	0.4153
Age ~ Stroop colour	0.05452
Age ~ Stroop colour-word	0.4486
Age ~ Stroop interference	0.184
Age ~ D-KEFS Trail 1	0.9753
Age ~ D-KEFS Trail2	0.9951
Age ~ D-KEFS Trail 3	0.2491
Age ~ D-KEFS Trail 4	0.1955
Age ~ D-KEFS Trail 5	0.7361
Age ~ D-KEFS Trails motor contrast	0.2209
Age ~ FAS word association	0.07739
Age ~ Block design standard score	0.1161
Age ~ Block design non-adjusted score	0.006594	0.1398
Age ~ ECAS language	0.4059
Age ~ ECAS verbal fluency	0.02121	0.0969
Age ~ ECAS executive	0.2273
Age ~ ECAS memory	0.04425	0.06967
Age ~ ECAS visuospatial	0.3076
Age ~ ECAS total	0.5801
GMV + sex ~ Stroop word	0.007648	0.1998
GMV + sex ~ Stroop colour	0.0001593	0.367
GMV + sex ~ Stroop colour-word	0.00142	0.2872
GMV + sex ~ Stroop interference	0.001894	0.2746
GMV + sex ~ D-KEFS Trail 1	0.1546
GMV + sex ~ D-KEFS Trail2	0.01227	0.1734
GMV + sex ~ D-KEFS Trail 3	0.003274	0.2319
GMV + sex ~ D-KEFS Trail 4	0.02778	0.135
GMV + sex ~ D-KEFS Trail 5	0.2939
GMV + sex ~ D-KEFS Trails motor contrast	0.2218
GMV + sex ~ FAS word association	0.9274
GMV + sex ~ Block design standard score	0.01561	0.1622
GMV + sex ~ Block design non-adjusted score	0.003822	0.2253
GMV + sex ~ ECAS language	0.2675
GMV + sex ~ ECAS verbal fluency	0.4162
GMV + sex ~ ECAS executive	0.0338	0.1255
GMV + sex ~ ECAS memory	0.4363
GMV + sex ~ ECAS visuospatial	0.3194
GMV + sex ~ ECAS total	0.09041	0.07638
GMV + age + sex ~ Stroop word	0.002604	0.2798
GMV + age + sex ~ Stroop colour	0.000173	0.3991
GMV + age + sex ~ Stroop colour-word	0.0006897	0.3531
GMV + age + sex ~ Stroop interference	0.005679	0.2572
GMV + age + sex ~ D-KEFS Trail 1	0.01295	0.1989
GMV + age + sex ~ D-KEFS Trail2	0.006539	0.2315
GMV + age + sex ~ D-KEFS Trail 3	0.002441	0.2759
GMV + age + sex ~ D-KEFS Trail 4	0.04275	0.1374
GMV + age + sex ~ D-KEFS Trail 5	0.4328
GMV + age + sex ~ D-KEFS Trails motor contrast	0.355
GMV + age + sex ~ FAS word association	0.006143	0.2344
GMV + age + sex ~ Block design standard score	0.0407	0.1401
GMV + age + sex ~ Block design non-adjusted score	0.009485	0.2139
GMV + age + sex ~ ECAS language	0.2452
GMV + age + sex ~ ECAS verbal fluency	0.006485	0.2319
GMV + age + sex ~ ECAS executive	0.05022
GMV + age + sex ~ ECAS memory	0.3141
GMV + age + sex ~ ECAS visuospatial	0.5175
GMV + age + sex ~ ECAS total	0.08332
VWML ~ age	3.808e-05	0.3546
VWML ~ age + gender	0.0002297	0.3373
VWML ~ age + logPAL	0.0002298	0.3373
VWML ~ age + MAL	0.0002229	0.3384
VWML ~ age + BMI	0.0001256	0.3592
VWML ~ age + smoking status	0.0001469	0.3535
VWML ~ Self-DEX	0.4942
VWML ~ informant-DEX	0.0004793	0.2776
VWML ~ BDI	0.1465
VWML ~ MDHI16 Cognitive impairment subscore	0.168
VWML ~ Stroop word	0.05536
VWML ~ Stroop colour	0.14
VWML ~ Stroop colour-word	0.4168
VWML ~ Stroop interference	0.6542
VWML ~ D-KEFS Trail 1	0.4394
VWML ~ D-KEFS Trail2	0.7868
VWML ~ D-KEFS Trail 3	0.4
VWML ~ D-KEFS Trail 4	0.4872
VWML ~ D-KEFS Trail 5	0.896
VWML ~ D-KEFS Trails motor contrast	0.4522
VWML ~ FAS word association	0.8957
VWML ~ Block design standard score	0.6958
VWML ~ Block design non-adjusted score	0.2286
VWML ~ ECAS language	0.5548
VWML ~ ECAS verbal fluency	0.4452
VWML ~ ECAS executive	0.2206
VWML ~ ECAS memory	0.1309
VWML ~ ECAS visuospatial	0.7565
VWML ~ ECAS total	0.4095
MDHI16 cognitive impairment subscore ~ Stroop word	0.4673
MDHI16 cognitive impairment subscore ~ Stroop colour	0.8247
MDHI16 cognitive impairment subscore ~ Stroop colour-word	0.0955
MDHI16 cognitive impairment subscore ~ Stroop interference	0.008756	0.142
MDHI16 cognitive impairment subscore ~ D-KEFS Trail 1	0.4419
MDHI16 cognitive impairment subscore ~ D-KEFS Trail2	0.99
MDHI16 cognitive impairment subscore ~ D-KEFS Trail 3	0.163
MDHI16 cognitive impairment subscore ~ D-KEFS Trail 4	0.517
MDHI16 cognitive impairment subscore ~ D-KEFS Trail 5	0.04057	0.07288
MDHI16 cognitive impairment subscore ~ D-KEFS Trails motor contrast	0.333
MDHI16 cognitive impairment subscore ~ FAS word association	0.6072
MDHI16 cognitive impairment subscore ~ Block design standard score	0.2428
MDHI16 cognitive impairment subscore ~ Block design non-adjusted score	0.221
MDHI16 cognitive impairment subscore ~ ECAS language	0.3821
MDHI16 cognitive impairment subscore ~ ECAS verbal fluency	0.1987
MDHI16 cognitive impairment subscore ~ ECAS executive	0.9469
MDHI16 cognitive impairment subscore ~ ECAS memory	0.6695
MDHI16 cognitive impairment subscore ~ ECAS visuospatial	0.9299
MDHI16 cognitive impairment subscore ~ ECAS total	0.5284
Self-DEX ~ informant-DEX	0.00647	0.1469
Stroop colour-word ~ ECAS executive	0.047	0.075
Stroop colour-word ~ ECAS cognitive inhibition task	0.212
Stroop interference ~ ECAS executive	0.167
Stroop interference ~ ECAS cognitive inhibition task	0.516
D-KEFS Trail 4 ~ ECAS executive	0.006	0.141
D-KEFS Trail 4 ~ ECAS number-letter alternation	0.209
D-KEFS motor contrast score ~ ECAS executive	0.217
D-KEFS motor contrast score ~ ECAS number-letter alternation	0.379
Block design standard score ~ ECAS visuospatial score	0.008	0.134
Block design non-adjusted score ~ ECAS visuospatial score	0.024	0.092
Block design standard score ~ ECAS executive score	0.011	0.122
Block design non-adjusted score ~ ECAS executive score	0.009	0.127
GMV + age + sex + DM1Activ ~ Stroop word	0.001663	0.3272
GMV + age + sex + DM1Activ ~ Stroop colour	0.0001891	0.425
GMV + age + sex + DM1Activ ~ Stroop colour-word	0.002125	0.3325
GMV + age + sex + DM1Activ ~ Stroop interference	0.01367	0.2378
GMV + age + sex + DM1Activ ~ D-KEFS Trail 1	0.0001747	0.4097
GMV + age + sex + DM1Activ ~ D-KEFS Trail2	0.004508	0.2743
GMV + age + sex + DM1Activ ~ D-KEFS Trail 3	0.00258	0.3
GMV + age + sex + DM1Activ ~ D-KEFS Trail 4	0.06351	0.1336	*
GMV + age + sex + DM1Activ ~ D-KEFS Trail 5	0.002623	0.2993
GMV + age + sex + DM1Activ ~ D-KEFS Trails motor contrast	0.1305	0.08783
GMV + age + sex + DM1Activ ~ FAS word association	0.01404	0.2182
GMV + age + sex + DM1Activ ~ Block design standard score	0.01544	0.2132
GMV + age + sex + DM1Activ ~ Block design non-adjusted score	0.004256	0.277
GMV + age + sex + DM1Activ ~ ECAS language	0.2291	0.04836
GMV + age + sex + DM1Activ ~ ECAS verbal fluency	0.01553	0.2129
GMV + age + sex + DM1Activ ~ ECAS executive	0.06246	0.1347
GMV + age + sex + DM1Activ ~ ECAS memory	0.3283
GMV + age + sex + DM1Activ ~ ECAS visuospatial	0.6874
GMV + age + sex + DM1Activ ~ ECAS total	0.1024

## Sheet: Benjamini-Hochberg correction
Labels	P-values	Benjamini-Hochberg significance	Benjamini-Hochberg P-value
DM1ActivC ~ MDHI2 Mobility subscore	1.36e-14	significant	6.052e-12
DM1ActivC ~ MDHI4 Ability to do activities subscore	1.587e-12	significant	3.53108e-10		False discovery rate = 0.05
BDI ~ MDHI16 cognitive impairment subscore	5.95e-11	significant	8.82583e-09
BDI ~ MDHI 14 emotional subscore	1.411e-10	significant	1.56974e-08
McGill pain scale ~ MDHI9 pain subscore	6.63e-10	significant	5.9007e-08
GMV ~ age + gender + logPAL	1.043e-09	significant	6.72586e-08
GMV ~ age + gender	1.058e-09	significant	6.72586e-08
GMV ~ age	1.522e-09	significant	8.46612e-08
GMV ~ age + smoking status	4.27e-09	significant	2.11128e-07
DM1ActivC ~ MDHI3 Upper limb subscore	8.473e-09	significant	3.77048e-07
GMV ~ age + BMI	1.042e-08	significant	4.21536e-07
SF36 pain items ~ MDHI9 pain subscore	1.169e-08	significant	4.33504e-07
FDSScentile score ~ MDHI8 fatigue subscore	2.859e-08	significant	9.78658e-07
BDI ~ self-DEX	8.011e-08	significant	2.54635e-06
BDI ~ MDHI7 social performance subscore	4.032e-07	significant	1.19616e-05
BDI ~ MDHI total	8.389e-07	significant	2.33319e-05
BDI ~ MDHI6 Social satisfaction subscore	1.776e-06	significant	4.64894e-05
BDI ~ FDSS	2.338e-06	significant	5.78006e-05
BDI ~ MDHI15 sleep subscore	8.047e-06	significant	0.000188469
BDI ~ MHDI short form	3.005e-05	significant	0.000668612
BDI ~ MDHI13 vision subscore	3.67e-05	significant	0.000770255
VWML ~ age	3.808e-05	significant	0.000770255
DM1ActivC ~ D-KEFS Trail 5	4.96e-05	significant	0.000959652
BDI ~ MDHI8 fatigue subscore	7.185e-05	significant	0.00133222
BDI ~ MDHI11 gastro subscore	8.9e-05	significant	0.0015842
VWML ~ age + BMI	0.0001256	significant	0.00214969
VWML ~ age + smoking status	0.0001469	significant	0.00242113
GMV + sex ~ Stroop colour	0.0001593	significant	0.00250779
GMV + age + sex ~ Stroop colour	0.000173	significant	0.00250779
GMV ~ Stroop colour	0.0001743	significant	0.00250779
GMV + age + sex + DM1Activ ~ D-KEFS Trail 1	0.0001747	significant	0.00250779
GMV + age + sex + DM1Activ ~ Stroop colour	0.0001891	significant	0.00262967
VWML ~ age + MAL	0.0002229	significant	0.00292174
VWML ~ age + gender	0.0002297	significant	0.00292174
VWML ~ age + logPAL	0.0002298	significant	0.00292174
BDI ~ McGill pain	0.000243	significant	0.00300375
BDI ~ MDHI3 Upper limb subscore	0.000289	significant	0.00347581
BDI ~ MDHI9 pain subscore	0.000345	significant	0.00404013
VWML ~ informant-DEX	0.0004793	significant	0.00546894
BDI ~ MDHI5 Communication subscore	0.000493	significant	0.00548462
DM1ActivC ~ Block design standard score	0.0005198	significant	0.00564173
GMV + age + sex ~ Stroop colour-word	0.0006897	significant	0.00730754
BDI ~ MDHI4 Ability activities subscore	0.000727	significant	0.0075236
BDI ~ MDHI17 hearing subscore	0.0008542	significant	0.00847082
BDI ~ SF36 pain	0.0008566	significant	0.00847082
MAL ~ MDHI2 Mobility subscore	0.0008874	significant	0.00858463
DM1ActivC ~ Block design non-adjusted score	0.0009108	significant	0.00862353
DM1ActivC ~ D-KEFS Trail 1	0.00128	significant	0.0118667
GMV + sex ~ Stroop colour-word	0.00142	significant	0.0128959
GMV + age + sex + DM1Activ ~ Stroop word	0.001663	significant	0.0148007
GMV + sex ~ Stroop interference	0.001894	significant	0.0165261
GMV + age + sex + DM1Activ ~ Stroop colour-word	0.002125	significant	0.0181851
GMV + age + sex ~ D-KEFS Trail 3	0.002441	significant	0.0204952
GMV + age + sex + DM1Activ ~ D-KEFS Trail 3	0.00258	significant	0.0208435
GMV + age + sex ~ Stroop word	0.002604	significant	0.0208435
GMV + age + sex + DM1Activ ~ D-KEFS Trail 5	0.002623	significant	0.0208435
MAL ~ Block design standard score	0.00303	significant	0.0236553
BDI ~ MDHI18 breathing subscore	0.003224	significant	0.0242822
Informant-DEX ~ Stroop word	0.003248	significant	0.0242822
GMV + sex ~ D-KEFS Trail 3	0.003274	significant	0.0242822
GMV + sex ~ Block design non-adjusted score	0.003822	significant	0.0278818
GMV + age + sex + DM1Activ ~ Block design non-adjusted score	0.004256	significant	0.0305471
GMV + age + sex + DM1Activ ~ D-KEFS Trail2	0.004508	significant	0.0318422
Age + logPAL + (Age*logPAL) ~ Block design non-adjusted score	0.005072	significant	0.0352662
GMV ~ Stroop word	0.005677	significant	0.0382902
GMV + age + sex ~ Stroop interference	0.005679	significant	0.0382902
D-KEFS Trail 4 ~ ECAS executive	0.006	significant	0.0395788
MAL ~ DM1-ActivC	0.006048	significant	0.0395788
GMV + age + sex ~ FAS word association	0.006143	significant	0.0396179
BDI ~ MDHI12 swallow subscore	0.006335	significant	0.0396531
Self-DEX ~ informant-DEX	0.00647	significant	0.0396531
GMV + age + sex ~ ECAS verbal fluency	0.006485	significant	0.0396531
GMV + age + sex ~ D-KEFS Trail2	0.006539	significant	0.0396531
Age ~ Block design non-adjusted score	0.006594	significant	0.0396531
GMV + sex ~ Stroop word	0.007648	significant	0.0453781
Age + logPAL + (Age*logPAL) ~ MDHI2 Mobility subscore	0.007895	significant	0.0462273
Block design standard score ~ ECAS visuospatial score	0.008	significant	0.0462338
BDI ~ MDHI2 Mobility subscore	0.008534	significant	0.0486876
MDHI16 cognitive impairment subscore ~ Stroop interference	0.008756	significant	0.0493218
Block design non-adjusted score ~ ECAS executive score	0.009	not significant	0.0500625
GMV + age + sex ~ Block design non-adjusted score	0.009485	not significant	0.052109
Block design standard score ~ ECAS executive score	0.011	not significant	0.0596951
GMV + sex ~ D-KEFS Trail2	0.01227	not significant	0.0657849
GMV + age + sex ~ D-KEFS Trail 1	0.01295	not significant	0.0686042
GMV + age + sex + DM1Activ ~ Stroop interference	0.01367	not significant	0.0715665
GMV + age + sex + DM1Activ ~ FAS word association	0.01404	not significant	0.0723253
DM1ActivC ~ D-KEFS Trail2	0.01414	not significant	0.0723253
MAL ~ MDHI8 fatigue subscore	0.01518	not significant	0.0763346
GMV + age + sex + DM1Activ ~ Block design standard score	0.01544	not significant	0.0763346
GMV + age + sex + DM1Activ ~ ECAS verbal fluency	0.01553	not significant	0.0763346
GMV + sex ~ Block design standard score	0.01561	not significant	0.0763346
GMV ~ ECAS executive	0.01608	not significant	0.0777783
MAL ~ MDHI3 Upper limb subscore	0.01673	not significant	0.0800522
BDI ~ MDHI10 myotonia subscore	0.01734	not significant	0.0812242
Age + logPAL + (Age*logPAL) ~ Block design standard score	0.01734	not significant	0.0812242
BDI ~ DM1-ActivC	0.02047	not significant	0.094887
MAL ~ MHDI short form	0.02077	not significant	0.0952851
Age ~ ECAS verbal fluency	0.02121	not significant	0.0963107
Block design non-adjusted score ~ ECAS visuospatial score	0.024	not significant	0.107879
GMV ~ Block design non-adjusted score	0.02512	not significant	0.111784
DM1ActivC ~ D-KEFS Trail 3	0.02612	not significant	0.115083
MAL ~ MDHI4 Ability activities subscore	0.02649	not significant	0.115569
DM1ActivC ~ Stroop colour	0.027	not significant	0.11665
MAL ~ Block design non-adjusted score	0.02735	not significant	0.117026
GMV + sex ~ D-KEFS Trail 4	0.02778	not significant	0.117734
GMV ~ informant-DEX	0.02881	not significant	0.120948
MAL ~ MDHI total	0.032	not significant	0.133084
GMV ~ Stroop colour-word	0.03296	not significant	0.135807
GMV + sex ~ ECAS executive	0.0338	not significant	0.137991
Informant-DEX ~ D-KEFS Trail 1	0.03601	not significant	0.144525
GMV ~ D-KEFS Trail 3	0.03605	not significant	0.144525
Age + logPAL + (Age*logPAL) ~ DM1-ActivC	0.03819	not significant	0.151737
Age + logPAL + (Age*logPAL) ~ ECAS verbal fluency	0.04034	not significant	0.15594
MDHI16 cognitive impairment subscore ~ D-KEFS Trail 5	0.04057	not significant	0.15594
GMV + age + sex ~ Block design standard score	0.0407	not significant	0.15594
MAL ~ MDHI9 pain subscore	0.04091	not significant	0.15594
DM1ActivC ~ Stroop word	0.041	not significant	0.15594
MAL ~ D-KEFS Trail2	0.04153	not significant	0.156617
GMV + age + sex ~ D-KEFS Trail 4	0.04275	not significant	0.159863
Age ~ ECAS memory	0.04425	not significant	0.163988
BDI ~ D-KEFS Trails motor contrast	0.04459	not significant	0.163988
MAL ~ MDHI18 breathing subscore	0.04579	not significant	0.167021
Stroop colour-word ~ ECAS executive	0.047	not significant	0.170041
MAL ~ D-KEFS Trail 5	0.04811	not significant	0.172653
MAL ~ MDHI11 gastro subscore	0.049	not significant	0.17444
GMV + age + sex ~ ECAS executive	0.05022	not significant	0.177364
GMV ~ D-KEFS Trail 4	0.05088	not significant	0.17828
Age ~ Stroop colour	0.05452	not significant	0.188694
LogPAL ~ Block design standard score	0.0547	not significant	0.188694
VWML ~ Stroop word	0.05536	not significant	0.189502
MAL ~ D-KEFS Trail 3	0.0598	not significant	0.201421
LogPAL ~ MDHI11 gastro subscore	0.05998	not significant	0.201421
MAL ~ MDHI7 social performance subscore	0.0602	not significant	0.201421
GMV + age + sex + DM1Activ ~ ECAS executive	0.06246	not significant	0.207337
Informant-DEX ~ Stroop colour	0.0629	not significant	0.207337
GMV + age + sex + DM1Activ ~ D-KEFS Trail 4	0.06351	not significant	0.207808
FDSS centile score ~ Block design standard score	0.06532	not significant	0.211487
Informant-DEX ~ FAS word association	0.06559	not significant	0.211487
MAL ~ MDHI10 myotonia subscore	0.06606	not significant	0.211487
GMV ~ D-KEFS Trail 1	0.06793	not significant	0.21592
FDSS centile score ~ Stroop interference	0.07243	not significant	0.228591
Age ~ FAS word association	0.07739	not significant	0.242385
LogPAL ~ MDHI2 Mobility subscore	0.07789	not significant	0.242385
Age + logPAL + (Age*logPAL) ~ MDHI8 fatigue subscore	0.07954	not significant	0.245801
GMV + age + sex ~ ECAS total	0.08332	not significant	0.255706
MAL ~ MDHI6 Social satisfaction subscore	0.08536	not significant	0.260173
GMV ~ ECAS total	0.08639	not significant	0.261521
MAL ~ MDHI12 swallow subscore	0.0886	not significant	0.266399
GMV + sex ~ ECAS total	0.09041	not significant	0.270016
MAL ~ FDSS	0.09254	not significant	0.274535
MDHI16 cognitive impairment subscore ~ Stroop colour-word	0.0955	not significant	0.28144
DM1ActivC ~ D-KEFS Trail 4	0.09848	not significant	0.288313
Self-DEX ~ D-KEFS Trails motor contrast	0.1018	not significant	0.295896
GMV + age + sex + DM1Activ ~ ECAS total	0.1024	not significant	0.295896
Age + logPAL + (Age*logPAL) ~ MDHI10 myotonia subscore	0.106	not significant	0.304323
Age + logPAL + (Age*logPAL) ~ D-KEFS Trail 3	0.1105	not significant	0.315208
GMV ~ D-KEFS Trails motor contrast	0.1121	not significant	0.317133
McGill pain scale ~ D-KEFS Trails motor contrast	0.1126	not significant	0.317133
LogPAL ~ D-KEFS Trail 3	0.1142	not significant	0.318453
Age + logPAL + (Age*logPAL) ~ MDHI13 vision subscore	0.1145	not significant	0.318453
Age ~ Block design standard score	0.1161	not significant	0.319466
Age + logPAL + (Age*logPAL) ~ MDHI4 Ability activities subscore	0.1163	not significant	0.319466
FDSS centile score ~ D-KEFS Trails motor contrast	0.1173	not significant	0.320236
LogPAL ~ MDHI13 vision subscore	0.1203	not significant	0.324636
LogPAL ~ MDHI3 Upper limb subscore	0.1208	not significant	0.324636
GMV ~ Block design standard score	0.1211	not significant	0.324636
Age + logPAL + (Age*logPAL) ~ MHDI short form	0.124	not significant	0.330419
LogPAL ~ D-KEFS Trail 5	0.1268	not significant	0.335869
MAL ~ SF36 pain	0.1285	not significant	0.338358
GMV + age + sex + DM1Activ ~ D-KEFS Trails motor contrast	0.1305	not significant	0.338924
VWML ~ ECAS memory	0.1309	not significant	0.338924
Self-DEX ~ ECAS memory	0.131	not significant	0.338924
FDSS centile score ~ Block design non-adjusted score	0.1368	not significant	0.351884
Informant-DEX ~ Stroop colour-word	0.1381	not significant	0.353187
VWML ~ Stroop colour	0.14	not significant	0.356
Age + logPAL + (Age*logPAL) ~ Stroop colour	0.1424	not significant	0.359771
McGill pain scale ~ Stroop colour-word	0.1431	not significant	0.359771
LogPAL ~ D-KEFS Trail 1	0.1445	not significant	0.36125
VWML ~ BDI	0.1465	not significant	0.364204
LogPAL ~ MHDI short form	0.148	not significant	0.365889
BDI ~ Stroop colour	0.1497	not significant	0.368047
GMV ~ Stroop interference	0.1513	not significant	0.369937
GMV + sex ~ D-KEFS Trail 1	0.1546	not significant	0.37594
LogPAL ~ D-KEFS Trail2	0.1568	not significant	0.379217
FDSS centile score ~ D-KEFS Trail 5	0.1604	not significant	0.385827
LogPAL ~ MDHI8 fatigue subscore	0.1622	not significant	0.387888
MDHI16 cognitive impairment subscore ~ D-KEFS Trail 3	0.163	not significant	0.387888
MAL ~ Stroop interference	0.1641	not significant	0.388428
McGill pain scale ~ Stroop interference	0.1656	not significant	0.388555
Age + logPAL + (Age*logPAL) ~ MDHI3 Upper limb subscore	0.1659	not significant	0.388555
Stroop interference ~ ECAS executive	0.167	not significant	0.389084
VWML ~ MDHI16 Cognitive impairment subscore	0.168	not significant	0.389375
MAL ~ D-KEFS Trail 1	0.1719	not significant	0.39635
Age + logPAL + (Age*logPAL) ~ ECAS memory	0.1737	not significant	0.398436
Informant-DEX ~ Block design standard score	0.1769	not significant	0.403695
Age + logPAL + (Age*logPAL) ~ ECAS visuospatial	0.1821	not significant	0.411295
Age ~ Stroop interference	0.184	not significant	0.411295
GMV ~ ECAS visuospatial	0.1848	not significant	0.411295
MAL ~ McGill pain	0.1854	not significant	0.411295
DM1ActivC ~ D-KEFS Trails motor contrast	0.1856	not significant	0.411295
DM1ActivC ~ Stroop colour-word	0.186	not significant	0.411295
LogPAL ~ MDHI7 social performance subscore	0.1867	not significant	0.411295
Age ~ D-KEFS Trail 4	0.1955	not significant	0.428559
MDHI16 cognitive impairment subscore ~ ECAS verbal fluency	0.1987	not significant	0.433439
Age + logPAL + (Age*logPAL) ~ MDHI total	0.2008	not significant	0.435883
D-KEFS Trail 4 ~ ECAS number-letter alternation	0.209	not significant	0.450589
Age + logPAL + (Age*logPAL) ~ D-KEFS Trail 4	0.2096	not significant	0.450589
Stroop colour-word ~ ECAS cognitive inhibition task	0.212	not significant	0.453558
LogPAL ~ ECAS visuospatial	0.216	not significant	0.456949
D-KEFS motor contrast score ~ ECAS executive	0.217	not significant	0.456949
Informant-DEX ~ ECAS language	0.2189	not significant	0.456949
LogPAL ~ self-DEX	0.2191	not significant	0.456949
VWML ~ ECAS executive	0.2206	not significant	0.456949
Age ~ D-KEFS Trails motor contrast	0.2209	not significant	0.456949
MDHI16 cognitive impairment subscore ~ Block design non-adjusted score	0.221	not significant	0.456949
GMV + sex ~ D-KEFS Trails motor contrast	0.2218	not significant	0.456949
LogPAL ~ DM1-ActivC	0.2253	not significant	0.46131
LogPAL ~ MDHI total	0.2271	not significant	0.46131
Age ~ ECAS executive	0.2273	not significant	0.46131
VWML ~ Block design non-adjusted score	0.2286	not significant	0.46131
GMV + age + sex + DM1Activ ~ ECAS language	0.2291	not significant	0.46131
MAL ~ ECAS visuospatial	0.2379	not significant	0.476872
GMV ~ ECAS memory	0.2407	not significant	0.478772
LogPAL ~ FDSS	0.241	not significant	0.478772
MDHI16 cognitive impairment subscore ~ Block design standard score	0.2428	not significant	0.480204
GMV + age + sex ~ ECAS language	0.2452	not significant	0.482805
BDI ~ D-KEFS Trail 5	0.2486	not significant	0.486182
Age ~ D-KEFS Trail 3	0.2491	not significant	0.486182
DM1ActivC ~ ECAS memory	0.2524	not significant	0.48892
Age + logPAL + (Age*logPAL) ~ self-DEX	0.2527	not significant	0.48892
LogPAL ~ MDHI18 breathing subscore	0.2599	not significant	0.500673
LogPAL ~ MDHI6 Social satisfaction subscore	0.2621	not significant	0.50115
Age + logPAL + (Age*logPAL) ~ ECAS total	0.2624	not significant	0.50115
Age + logPAL + (Age*logPAL) ~ Stroop interference	0.2644	not significant	0.502812
McGill pain scale ~ Stroop word	0.2662	not significant	0.504081
GMV + sex ~ ECAS language	0.2675	not significant	0.504396
Age + logPAL + (Age*logPAL) ~ ECAS executive	0.2693	not significant	0.505648
MAL ~ D-KEFS Trail 4	0.2706	not significant	0.505954
McGill pain scale ~ D-KEFS Trail 5	0.2744	not significant	0.510912
Self-DEX ~ FAS word association	0.278	not significant	0.51175
Informant-DEX ~ ECAS total	0.2782	not significant	0.51175
MAL ~ informant-DEX	0.2808	not significant	0.51175
MAL ~ MDHI13 vision subscore	0.2812	not significant	0.51175
LogPAL ~ MDHI4 Ability activities subscore	0.2819	not significant	0.51175
DM1ActivC ~ Stroop interference	0.283	not significant	0.51175
LogPAL ~ MDHI9 pain subscore	0.2831	not significant	0.51175
LogPAL ~ FAS word association	0.2851	not significant	0.51175
Age + logPAL + (Age*logPAL) ~ FAS word association	0.2852	not significant	0.51175
Informant-DEX ~ ECAS executive	0.2864	not significant	0.511839
DM1ActivC ~ ECAS visuospatial	0.2886	not significant	0.513708
LogPAL ~ Block design non-adjusted score	0.2919	not significant	0.517512
GMV + sex ~ D-KEFS Trail 5	0.2939	not significant	0.51899
Age + logPAL + (Age*logPAL) ~ D-KEFS Trail 5	0.2982	not significant	0.524364
FDSS centile score ~ ECAS verbal fluency	0.2993	not significant	0.524364
Age ~ ECAS visuospatial	0.3076	not significant	0.536792
GMV ~ D-KEFS Trail2	0.3113	not significant	0.539306
Age + logPAL + (Age*logPAL) ~ FDSS	0.3121	not significant	0.539306
BDI ~ ECAS verbal fluency	0.3141	not significant	0.539306
GMV + age + sex ~ ECAS memory	0.3141	not significant	0.539306
Age + logPAL + (Age*logPAL) ~ MDHI11 gastro subscore	0.3151	not significant	0.539306
LogPAL ~ D-KEFS Trail 4	0.3172	not significant	0.54082
GMV + sex ~ ECAS visuospatial	0.3194	not significant	0.542492
LogPAL ~ Stroop colour-word	0.3251	not significant	0.546547
MAL ~ Stroop colour-word	0.3259	not significant	0.546547
MAL ~ Stroop colour	0.326	not significant	0.546547
Self-DEX ~ D-KEFS Trail 5	0.3267	not significant	0.546547
GMV + age + sex + DM1Activ ~ ECAS memory	0.3283	not significant	0.547167
MDHI16 cognitive impairment subscore ~ D-KEFS Trails motor contrast	0.333	not significant	0.552929
DM1ActivC ~ ECAS executive	0.336	not significant	0.555836
LogPAL ~ MDHI12 swallow subscore	0.3497	not significant	0.575052
Age + logPAL + (Age*logPAL) ~ D-KEFS Trail 1	0.3502	not significant	0.575052
GMV ~ BDI	0.3528	not significant	0.577191
GMV + age + sex ~ D-KEFS Trails motor contrast	0.355	not significant	0.578176
LogPAL ~ MDHI10 myotonia subscore	0.3562	not significant	0.578176
Age + logPAL + (Age*logPAL) ~ MDHI9 pain subscore	0.3573	not significant	0.578176
LogPAL ~ MDHI5 Communication subscore	0.3624	not significant	0.582487
MAL ~ MDHI5 Communication subscore	0.3626	not significant	0.582487
Age + logPAL + (Age*logPAL) ~ SF36 pain	0.3645	not significant	0.582487
LogPAL ~ ECAS memory	0.3652	not significant	0.582487
McGill pain scale ~ Block design standard score	0.3683	not significant	0.584496
DM1ActivC ~ ECAS verbal fluency	0.3701	not significant	0.584496
McGill pain scale ~ Stroop colour	0.3704	not significant	0.584496
LogPAL ~ Stroop interference	0.3755	not significant	0.590451
D-KEFS motor contrast score ~ ECAS number-letter alternation	0.379	not significant	0.592455
Self-DEX ~ ECAS visuospatial	0.3808	not significant	0.592455
Age + logPAL + (Age*logPAL) ~ MDHI7 social performance subscore	0.3821	not significant	0.592455
MDHI16 cognitive impairment subscore ~ ECAS language	0.3821	not significant	0.592455
BDI ~ D-KEFS Trail 4	0.3837	not significant	0.59287
FDSS centile score ~ D-KEFS Trail 1	0.3872	not significant	0.595474
FDSS centile score ~ ECAS executive	0.3892	not significant	0.595474
GMV ~ Self-DEX	0.3894	not significant	0.595474
Self-DEX ~ Stroop word	0.3957	not significant	0.603036
VWML ~ D-KEFS Trail 3	0.4	not significant	0.607107
BDI ~ D-KEFS Trail2	0.4011	not significant	0.607107
Informant-DEX ~ Block design non-adjusted score	0.4055	not significant	0.610221
Age ~ ECAS language	0.4059	not significant	0.610221
VWML ~ ECAS total	0.4095	not significant	0.610997
MAL ~ ECAS language	0.4119	not significant	0.610997
DM1ActivC ~ ECAS total	0.4142	not significant	0.610997
BDI ~ ECAS total	0.4148	not significant	0.610997
Age ~ Stroop word	0.4153	not significant	0.610997
GMV + sex ~ ECAS verbal fluency	0.4162	not significant	0.610997
VWML ~ Stroop colour-word	0.4168	not significant	0.610997
Informant-DEX ~ ECAS verbal fluency	0.4174	not significant	0.610997
Age + logPAL + (Age*logPAL) ~ MDHI6 Social satisfaction subscore	0.4196	not significant	0.612203
Age + logPAL + (Age*logPAL) ~ D-KEFS Trail2	0.4274	not significant	0.621546
Age + logPAL + (Age*logPAL) ~ McGill pain	0.4305	not significant	0.624015
GMV + age + sex ~ D-KEFS Trail 5	0.4328	not significant	0.625312
FDSS centile score ~ Stroop colour-word	0.4347	not significant	0.626024
GMV + sex ~ ECAS memory	0.4363	not significant	0.626302
VWML ~ D-KEFS Trail 1	0.4394	not significant	0.628723
MDHI16 cognitive impairment subscore ~ D-KEFS Trail 1	0.4419	not significant	0.62964
Self-DEX ~ ECAS verbal fluency	0.4448	not significant	0.62964
VWML ~ ECAS verbal fluency	0.4452	not significant	0.62964
Self-DEX ~ D-KEFS Trail 1	0.4457	not significant	0.62964
Age ~ Stroop colour-word	0.4486	not significant	0.631731
VWML ~ D-KEFS Trails motor contrast	0.4522	not significant	0.634792
LogPAL ~ MDHI 14 emotional subscore	0.4555	not significant	0.63482
MAL ~ MDHI 14 emotional subscore	0.4564	not significant	0.63482
GMV ~ D-KEFS Trail 5	0.4565	not significant	0.63482
FDSS centile score ~ ECAS visuospatial	0.4617	not significant	0.640051
MDHI16 cognitive impairment subscore ~ Stroop word	0.4673	not significant	0.645803
MAL ~ ECAS verbal fluency	0.4736	not significant	0.652483
Age + logPAL + (Age*logPAL) ~ ECAS language	0.4772	not significant	0.655414
FDSS centile score ~ D-KEFS Trail 3	0.4787	not significant	0.655451
Age + logPAL + (Age*logPAL) ~ Stroop colour-word	0.4856	not significant	0.662859
VWML ~ D-KEFS Trail 4	0.4872	not significant	0.663009
FDSS centile score ~ ECAS memory	0.4912	not significant	0.666415
VWML ~ Self-DEX	0.4942	not significant	0.668447
Self-DEX ~ D-KEFS Trail 4	0.5029	not significant	0.678153
McGill pain scale ~ FAS word association	0.5057	not significant	0.679869
BDI ~ ECAS language	0.5097	not significant	0.683182
Stroop interference ~ ECAS cognitive inhibition task	0.516	not significant	0.685379
Informant-DEX ~ D-KEFS Trail 4	0.5169	not significant	0.685379
MDHI16 cognitive impairment subscore ~ D-KEFS Trail 4	0.517	not significant	0.685379
GMV + age + sex ~ ECAS visuospatial	0.5175	not significant	0.685379
BDI ~ Stroop colour-word	0.528	not significant	0.695675
MDHI16 cognitive impairment subscore ~ ECAS total	0.5284	not significant	0.695675
DM1ActivC ~ ECAS language	0.5372	not significant	0.705174
BDI ~ Stroop interference	0.5395	not significant	0.705606
LogPAL ~ Stroop colour	0.5407	not significant	0.705606
Self-DEX ~ D-KEFS Trail2	0.5499	not significant	0.712
LogPAL ~ ECAS executive	0.5504	not significant	0.712
MAL ~ MDHI17 hearing subscore	0.5504	not significant	0.712
McGill pain scale ~ ECAS visuospatial	0.5545	not significant	0.713154
VWML ~ ECAS language	0.5548	not significant	0.713154
MAL ~ self-DEX	0.5561	not significant	0.713154
Self-DEX ~ ECAS language	0.5606	not significant	0.716335
McGill pain scale ~ D-KEFS Trail 4	0.5618	not significant	0.716335
Age ~ ECAS total	0.5801	not significant	0.737556
Informant-DEX ~ D-KEFS Trail 5	0.5825	not significant	0.738497
Age + logPAL + (Age*logPAL) ~ MDHI12 swallow subscore	0.585	not significant	0.738599
BDI ~ Block design standard score	0.5859	not significant	0.738599
McGill pain scale ~ D-KEFS Trail 1	0.5947	not significant	0.747575
Informant-DEX ~ D-KEFS Trail 3	0.599	not significant	0.749539
BDI ~ Stroop word	0.6005	not significant	0.749539
BDI ~ ECAS visuospatial	0.6016	not significant	0.749539
MAL ~ MDHI16 cognitive impairment subscore	0.603	not significant	0.749539
MDHI16 cognitive impairment subscore ~ FAS word association	0.6072	not significant	0.751803
Age + logPAL + (Age*logPAL) ~ informant-DEX	0.6082	not significant	0.751803
Informant-DEX ~ Stroop interference	0.6105	not significant	0.752555
Age + logPAL + (Age*logPAL) ~ MDHI5 Communication subscore	0.6145	not significant	0.755394
Informant-DEX ~ D-KEFS Trail2	0.6185	not significant	0.756256
LogPAL ~ informant-DEX	0.6193	not significant	0.756256
BDI ~ Block design non-adjusted score	0.6203	not significant	0.756256
MAL ~ D-KEFS Trails motor contrast	0.6224	not significant	0.756743
Age + logPAL + (Age*logPAL) ~ MDHI15 sleep subscore	0.6315	not significant	0.765569
BDI ~ informant-DEX	0.6331	not significant	0.765569
MAL ~ ECAS total	0.647	not significant	0.77887
LogPAL ~ ECAS total	0.6476	not significant	0.77887
LogPAL ~ MDHI17 hearing subscore	0.6523	not significant	0.782408
VWML ~ Stroop interference	0.6542	not significant	0.782578
McGill pain scale ~ D-KEFS Trail2	0.6624	not significant	0.789934
FDSS centile score ~ Stroop word	0.6639	not significant	0.789934
MDHI16 cognitive impairment subscore ~ ECAS memory	0.6695	not significant	0.794473
BDI ~ ECAS executive	0.679	not significant	0.802771
Age + logPAL + (Age*logPAL) ~ D-KEFS Trails motor contrast	0.6801	not significant	0.802771
FDSS centile score ~ ECAS total	0.6846	not significant	0.804982
FDSS centile score ~ D-KEFS Trail 4	0.6864	not significant	0.804982
GMV + age + sex + DM1Activ ~ ECAS visuospatial	0.6874	not significant	0.804982
VWML ~ Block design standard score	0.6958	not significant	0.81268
BDI ~ ECAS memory	0.7038	not significant	0.817963
LogPAL ~ SF36 pain	0.704	not significant	0.817963
McGill pain scale ~ Block design non-adjusted score	0.7077	not significant	0.820121
Self-DEX ~ Stroop colour	0.7181	not significant	0.830012
Age ~ D-KEFS Trail 5	0.7361	not significant	0.848613
Age + logPAL + (Age*logPAL) ~ MDHI18 breathing subscore	0.7389	not significant	0.84964
GMV ~ ECAS verbal fluency	0.7441	not significant	0.853414
MAL ~ ECAS executive	0.7518	not significant	0.858782
McGill pain scale ~ ECAS total	0.7528	not significant	0.858782
LogPAL ~ MDHI16 cognitive impairment subscore	0.7547	not significant	0.858782
VWML ~ ECAS visuospatial	0.7565	not significant	0.858782
McGill pain scale ~ ECAS verbal fluency	0.7602	not significant	0.860786
BDI ~ D-KEFS Trail 3	0.7645	not significant	0.863458
LogPAL ~ McGill pain	0.7687	not significant	0.866004
GMV ~ FAS word association	0.7785	not significant	0.87483
VWML ~ D-KEFS Trail2	0.7868	not significant	0.88156
Informant-DEX ~ ECAS memory	0.7948	not significant	0.88156
LogPAL ~ ECAS language	0.7964	not significant	0.88156
LogPAL ~ Stroop word	0.7969	not significant	0.88156
McGill pain scale ~ ECAS executive	0.7976	not significant	0.88156
Age + logPAL + (Age*logPAL) ~ Stroop word	0.8	not significant	0.88156
Self-DEX ~ Block design non-adjusted score	0.8006	not significant	0.88156
Informant-DEX ~ D-KEFS Trails motor contrast	0.8025	not significant	0.88156
FDSS centile score ~ D-KEFS Trail2	0.8034	not significant	0.88156
Self-DEX ~ Stroop colour-word	0.8043	not significant	0.88156
DM1ActivC ~ FAS word association	0.8121	not significant	0.886837
LogPAL ~ D-KEFS Trails motor contrast	0.8131	not significant	0.886837
McGill pain scale ~ D-KEFS Trail 3	0.8168	not significant	0.888694
MDHI16 cognitive impairment subscore ~ Stroop colour	0.8247	not significant	0.895101
BDI ~ FAS word association	0.8283	not significant	0.896821
Self-DEX ~ Block design standard score	0.8326	not significant	0.899289
FDSS centile score ~ FAS word association	0.8371	not significant	0.899972
Self-DEX ~ ECAS total	0.8385	not significant	0.899972
MAL ~ Stroop word	0.8393	not significant	0.899972
LogPAL ~ ECAS verbal fluency	0.8421	not significant	0.900804
MAL ~ BDI	0.8492	not significant	0.905437
MAL ~ ECAS memory	0.8505	not significant	0.905437
FDSS centile score ~ ECAS language	0.858	not significant	0.911241
MAL ~ MDHI15 sleep subscore	0.8708	not significant	0.922633
LogPAL ~ MDHI15 sleep subscore	0.8738	not significant	0.923613
VWML ~ FAS word association	0.8957	not significant	0.942144
VWML ~ D-KEFS Trail 5	0.896	not significant	0.942144
Age + logPAL + (Age*logPAL) ~ MDHI 14 emotional subscore	0.8986	not significant	0.942144
GMV ~ MDHI16 Cognitive impairment subscore	0.8998	not significant	0.942144
McGill pain scale ~ ECAS language	0.9138	not significant	0.952842
GMV ~ ECAS language	0.9143	not significant	0.952842
GMV + sex ~ FAS word association	0.9274	not significant	0.961632
MDHI16 cognitive impairment subscore ~ ECAS visuospatial	0.9299	not significant	0.961632
Age + logPAL + (Age*logPAL) ~ MDHI17 hearing subscore	0.9348	not significant	0.961632
FDSS centile score ~ Stroop colour	0.9355	not significant	0.961632
Self-DEX ~ ECAS executive	0.9357	not significant	0.961632
MAL ~ FAS word association	0.9357	not significant	0.961632
MDHI16 cognitive impairment subscore ~ ECAS executive	0.9469	not significant	0.9709
Age + logPAL + (Age*logPAL) ~ BDI	0.9496	not significant	0.97143
Self-DEX ~ D-KEFS Trail 3	0.9542	not significant	0.972585
BDI ~ D-KEFS Trail 1	0.9551	not significant	0.972585
Age + logPAL + (Age*logPAL) ~ MDHI16 cognitive impairment subscore	0.9649	not significant	0.980321
Age ~ D-KEFS Trail 1	0.9753	not significant	0.98863
Informant-DEX ~ ECAS visuospatial	0.9806	not significant	0.991743
McGill pain scale ~ ECAS memory	0.9862	not significant	0.99223
LogPAL ~ BDI	0.9883	not significant	0.99223
Self-DEX ~ Stroop interference	0.9889	not significant	0.99223
MDHI16 cognitive impairment subscore ~ D-KEFS Trail2	0.99	not significant	0.99223
Age ~ D-KEFS Trail2	0.9951	not significant	0.9951
